# Supplementary material
Source: PubMed Central journal article supplement (PMC10640705)
Supplement: jama-e2323204-s003.pdf [file jama-e2323204-s003.pdf]

| <b>*Group Name(s):</b>                   |                   |                              |                         |                                                             |                                                 |                                                                |                                                                                                   |
|------------------------------------------|-------------------|------------------------------|-------------------------|-------------------------------------------------------------|-------------------------------------------------|----------------------------------------------------------------|---------------------------------------------------------------------------------------------------|
| <b>*First Name and Middle Initial(s)</b> | <b>*Last Name</b> | <b>*Suffix (eg, Jr, III)</b> | <b>Academic Degrees</b> | <b>Institution</b>                                          | <b>Location (city, state/province, country)</b> | <b>Role or Contribution, eg, chair, principal investigator</b> | <b>Group (if more than 1 Group listed in the byline) and/or Subgroup (eg, Steering Committee)</b> |
| Scott                                    | Silvestry         |                              | MD                      | AdventHealth Orlando                                        | Orlando, FL                                     | Principal Investigator                                         |                                                                                                   |
| Antone                                   | Tatooles          |                              | MD                      | Advocate Christ Medical Center                              | Oak Lawn, IL                                    | Principal Investigator                                         |                                                                                                   |
| Nasir                                    | Siulemanjee       |                              | MD                      | Aurora Medical Group                                        | Milwaukee, WI                                   | Principal Investigator                                         |                                                                                                   |
| Brett                                    | Sheridan          |                              | MD                      | California Pacific Medical Center - Van Ness Campus         | San Francisco, CA                               | Principal Investigator                                         |                                                                                                   |
| Sanjeev                                  | Gulati            |                              | MD                      | Carolinas Medical Center                                    | Charlotte, NC                                   | Principal Investigator                                         |                                                                                                   |
| Eugene                                   | Chung             |                              | MD                      | Christ Hospital                                             | Cincinnati, OH                                  | Principal Investigator                                         |                                                                                                   |
| Clement                                  | Delmas            |                              | MD                      | CHU Rangueil Toulouse                                       | Toulouse, France                                | Principal Investigator                                         |                                                                                                   |
| Carmelo                                  | Milano            |                              | MD                      | Duke University Medical Center                              | Durham, NC                                      | Principal Investigator                                         |                                                                                                   |
| Pierre                                   | Dos Santos        |                              | MD                      | Hopital Haut Leveque                                        | Pessac, France                                  | Principal Investigator                                         |                                                                                                   |
| Pavan                                    | Atluri            |                              | MD                      | Hospital of the University of Pennsylvania                  | Philadelphia, PA                                | Principal Investigator                                         |                                                                                                   |
| Douglas                                  | Horstmanshof      |                              | MD                      | Integris Baptist Medical Center                             | Oklahoma City, OK                               | Principal Investigator                                         |                                                                                                   |
| David                                    | D'Alessandro      |                              | MD                      | Massachusetts General Hospital                              | Boston, MA                                      | Principal Investigator                                         |                                                                                                   |
| Sriram                                   | Nathan            |                              | MD                      | Memorial Hermann Hospital                                   | Houston, TX                                     | Principal Investigator                                         |                                                                                                   |
| Peter                                    | Eckman            |                              | MD                      | Minneapolis Heart Institute                                 | Minneapolis, MN                                 | Principal Investigator                                         |                                                                                                   |
| Anelechi                                 | Anyanwu           |                              | MD                      | Mount Sinai Hospital                                        | New York, NY                                    | Principal Investigator                                         |                                                                                                   |
| Anna Mara                                | Scandroglio       |                              | MD                      | Ospedale San Raffaele                                       | Milano, Italy                                   | Principal Investigator                                         |                                                                                                   |
| Alessandro                               | Ortalda           |                              | MD                      | Ospedale San Raffaele                                       | Milano, Italy                                   | Principal Investigator                                         |                                                                                                   |
| Ezequiel                                 | Molina            |                              | MD                      | Piedmont Heart Institute                                    | Atlanta, GA                                     | Principal Investigator                                         |                                                                                                   |
| Jacob                                    | Abraham           |                              | MD                      | Providence Heart & Vascular Institute                       | Portland, OR                                    | Principal Investigator                                         |                                                                                                   |
| Sern                                     | Lim               |                              | MD                      | Queen Elizabeth Hospital                                    | Birmingham, UK                                  | Principal Investigator                                         |                                                                                                   |
| Robert                                   | Adamson           |                              | MD                      | Sharp Memorial Hospital                                     | San Diego, CA                                   | Principal Investigator                                         |                                                                                                   |
| Ashwin                                   | Ravichandran      |                              | MD, MPH                 | St. Vincent Hospital                                        | Indianapolis, IN                                | Principal Investigator                                         |                                                                                                   |
| Christopher                              | Hayward           |                              | MD                      | St. Vincent's Hospital, Sydney                              | Darlinghurst, Australia                         | Principal Investigator                                         |                                                                                                   |
| William                                  | Hiesinger         |                              | MD                      | Stanford University Medical Center                          | Stanford, CA                                    | Principal Investigator                                         |                                                                                                   |
| John                                     | Entwistle         |                              | MD, PhD                 | Thomas Jefferson University Hospital                        | Philadelphia, PA                                | Principal Investigator                                         |                                                                                                   |
| Jennifer                                 | Conway            |                              | MD                      | University of Alberta Hospital                              | Edmonton, AB Canada                             | Principal Investigator                                         |                                                                                                   |
| Eric                                     | Adler             |                              | MD                      | University of California at San Diego (UCSD) Medical Center | San Diego, CA                                   | Principal Investigator                                         |                                                                                                   |
| Jonathan                                 | Grinstein         |                              | MD                      | University of Chicago                                       | Chicago, IL                                     | Principal Investigator                                         |                                                                                                   |
| Andreas                                  | Brieke            |                              | MD                      | University of Colorado Hospital                             | Aurora, CO                                      | Principal Investigator                                         |                                                                                                   |
| Mary                                     | Keebler           |                              | MD                      | University of Pittsburgh Medical Center                     | Pittsburgh, PA                                  | Principal Investigator                                         |                                                                                                   |
| Jeffrey                                  | Alexis            |                              | MD                      | University of Rochester Medical Center                      | Rochester, NY                                   | Principal Investigator                                         |                                                                                                   |
| Igor                                     | Gosev             |                              | MD                      | University of Rochester Medical Center                      | Rochester, NY                                   | Principal Investigator                                         |                                                                                                   |
| Craig                                    | Selzman           |                              | MD                      | University of Utah                                          | Salt Lake City, UT                              | Principal Investigator                                         |                                                                                                   |
| David M                                  | Kaye              |                              | MD                      | The Alfred Hospital                                         | Melbourne, Australia                            | Principal Investigator                                         |                                                                                                   |
