# Supplementary material
Source: PubMed Central journal article supplement (PMC10640705)
Supplement: jama-e2323204-s004.pdf [file jama-e2323204-s004.pdf]

## Data Sharing Statement

Mehra. Aspirin and Hemocompatibility Events With a Left Ventricular Assist Device in Advanced Heart Failure. *JAMA*. Published November 11, 2023. doi:10.1001/jama.2023.23204

### Data

**Data available:** No

### Additional Information

**Explanation for why data not available:** The ARIES trial data will be maintained at the trial sponsor (Abbott). The data are not publicly available. Data will be made available to pre-specified collaborators in the steering committee and principal investigators. Due to regulatory protection laws in some geographic regions, patient level trial data cannot be shared without the direct, written consent of patients.
